# Supplementary material for: Toward a Taxonomy for Adaptive Data Visualization in Analytics Applications
Source: Front Artif Intell. 2020 Mar 20;3:9. doi: 10.3389/frai.2020.00009 (PMC7861272; doi:10.3389/frai.2020.00009)
Supplement: Datasheet S2 — Study 2 raw data. [file Data_Sheet_2.xlsx]

## Sheet: Raw Data
		DEMOG					Visual Working Memory																														SGL 5						Perceptual Speed
								4				3				2				1				3				4				2			TOTAL		Norm: 21,9 (4,87)		SUM	19.8889	SD	2.96561	1					2
CASE	STARTED	Was ist dein höchster Bildungsabschluss?	Wenn du berufstätig bist, hast du in deinem Beruf viel mit Zahlen zu tun?	Wenn du berufstätig bist, hast du in deinem Beruf viel mit Grafiken zu tun?	Wie vertraut bist du mit Statistik und Dateninterpretation?	Welches Geschlecht hast du?	Merkzeit 1	Antwort 1	Fehler 1	AntwortZeit 1	Merkzeit 2	Antwort 2	Fehler 2	AntwortZeit 2	Merkzeit 3	Antwort 3	Fehler 3	AntwortZeit 3	Merkzeit 4	Antwort 4	Fehler 4	AntwortZeit 4	Merkzeit 5	Antwort 5	Fehler 5	AntwortZeit 5	Merkzeit 6	Antwort 6	Fehler 6	AntwortZeit 6	Merkzeit 7	Antwort 7	Fehler 7	AntwortZeit 7	Total Fehler	Summe RT	SG01_01	SG01_02	SG01_03	SG01_04	SG01_05	SUMME	PS01_01	PS01_01a	RT Errorfree	Mistrial	Fehler	PS01_02	PS01_02a
22	2017-07-04 13:49:05	6	2	2	4	1	14882	4	0	4049	2872	3	0	1657	2741	2	0	1945	1094	1	0	3111	2758	3	0	1795	2493	4	0	2431	8649	4	1	4661	1	19.649	5	5	5	5	5	25	-9	-1		1		-9	-1
25	2017-07-04 14:39:18	3	1	3	3	2	5770	4	0	5663	4489	1	1	11846	6180	2	0	3141	2555	2	1	2443	4995	3	0	3961	2705	4	0	3528	4140	2	0	6643	2	37.225	3	3	4	2	3	15	2	1792	1792	0	1	2	75
26	2017-07-04 14:39:31	3	1	2	3	1	6071	4	0	2693	4764	3	0	1964	3028	2	0	1518	2405	1	0	2389	2549	3	0	4580	3381	4	0	3381	11091	2	0	7830	0	24.355	4	4	4	3	2	17	-9	-1		1		-9	-1
28	2017-07-04 14:39:44	3	-1	-1	3	1	30559	4	0	3409	22814	3	0	1743	2978	2	0	3076	5401	1	0	2483	10733	3	0	3534	8468	4	0	3008	10930	2	0	4671	0	21.924	4	4	3	5	5	21	1	814	814	0	0	2	1015
32	2017-07-04 14:55:30	3	1	2	2	1	9103	4	0	2060	6575	3	0	1352	8748	2	0	2947	15709	1	0	1951	11535	3	0	2913	10699	4	0	4619	13690	2	0	4442	0	20.284	4	4	4	3	3	18	-9	-1		1		-9	-1
37	2017-07-04 15:03:10	6	1	2	3	2	14517	4	0	7022	13762	3	0	2229	3887	2	0	2849	7521	1	0	3295	5466	3	0	5300	17196	4	0	2616	15267	1	1	7841	1	31.152	4	2	3	4	3	16	-9	-1		1		1	1185
45	2017-07-04 15:20:32	5	-1	-1	3	1	13520	4	0	2107	8199	3	0	1774	8760	2	0	2717	11320	1	0	5055	11097	3	0	3519	6330	4	0	6802	12480	2	0	8005	0	29.979	4	4	5	3	5	21	1	635	635	0	0	2	805
50	2017-07-04 15:43:51	5	1	2	3	1	5285	4	0	3965	3002	3	0	1413	1633	2	0	15469	6098	1	0	2914	2826	3	0	7189	7359	4	0	2530	9959	2	0	5519	0	38.999	5	5	5	4	5	24	-9	-1		1		2	694
51	2017-07-04 15:45:31	6	2	3	2	1	5506	4	0	1641	3004	3	0	1075	2603	2	0	1188	2648	1	0	1723	2495	3	0	1813	3769	4	0	2277	4175	2	0	4213	0	13.93	4	4	5	3	4	20	1	983	983	0	0	2	937
53	2017-07-04 15:54:45	5	-1	-1	2	1	7711	4	0	2619	1342	3	0	3052	2100	4	1	1725	1206	1	0	1860	940	3	0	2317	1101	1	1	2164	1845	2	0	4469	2	18.206	5	5	4	5	5	24	2	1883	1883	0	1	2	2152
54	2017-07-04 15:59:53	5	-1	-1	3	1	11836	4	0	13219	6920	3	0	8473	6387	4	1	4976	13640	4	1	3778	14929	3	0	9914	12660	4	0	7196	29839	2	0	19951	2	67.507	4	4	4	3	4	19	-9	-1		1		1	508
58	2017-07-04 16:08:16	3	1	1	2	1	12195	4	0	2799	5032	3	0	1692	6904	2	0	2451	7349	1	0	2588	6792	3	0	2912	9101	4	0	2241	9693	2	0	10774	0	25.457	3	4	4	4	4	19	-9	-1		1		-9	-1
61	2017-07-04 16:21:16	5	1	3	3	1	6263	4	0	2307	3978	3	0	1778	4299	2	0	1838	2826	1	0	1824	3869	3	0	2019	3327	4	0	2006	3254	2	0	2705	0	14.477	4	4	3	2	2	15	1	1127	1127	0	0	2	856
63	2017-07-04 16:32:43	3	-1	-1	3	1	5788	4	0	11628	3336	3	0	2912	4783	4	1	14782	4933	3	1	5047	6838	3	0	15628	9332	4	0	4215	9301	4	1	9231	3	63.443	4	4	4	2	4	18	-9	-1		1		-9	-1
65	2017-07-04 16:36:05	5	-1	1	3	1	5205	4	0	3500	3496	3	0	3127	3436	2	0	2282	12529	1	0	2687	4414	3	0	4113	4890	4	0	2650	5919	2	0	15406	0	33.765	5	5	4	4	5	23	1	889	889	0	0	2	1130
67	2017-07-04 16:39:15	5	1	3	3	1	8163	4	0	2761	2492	3	0	1204	2909	2	0	1853	9341	1	0	2421	3068	3	0	2781	5821	4	0	4468	8646	2	0	4172	0	19.66	4	4	4	3	4	19	1	1598	1598	0	0	2	1141
69	2017-07-04 16:39:45	6	1	1	3	1	11969	4	0	3132	7952	3	0	1512	14633	2	0	1303	21355	1	0	3037	24806	3	0	1769	10837	4	0	5797	25264	2	0	15924	0	32.474	5	5	5	4	3	22	1	1068	1068	0	0	2	1069
73	2017-07-04 16:43:08	6	1	1	3	2	9552	4	0	5816	4925	3	0	2405	5587	1	1	21949	6406	3	1	7942	10416	3	0	18099	4444	4	0	3311	3138	1	1	7186	3	66.708	4	3	4	3	3	17	-9	-1		1		2	1427
81	2017-07-04 17:05:17	5	2	1	4	1	4944	4	0	2304	1977	3	0	1047	4631	2	0	1503	3232	1	0	3116	2617	3	0	2232	4185	4	0	2037	5617	2	0	3105	0	15.344	5	5	5	4	4	23	1	1139	1139	0	0	2	1095
84	2017-07-04 17:13:26	6	1	2	4	1	37089	4	0	14405	13259	3	0	2624	7225	2	0	3293	5417	1	0	6195	15314	3	0	4676	27917	4	0	8151	21769	2	0	12448	0	51.792	4	4	4	3	3	18	1	875	875	0	0	2	1087
86	2017-07-04 17:18:26	5	2	2	3	2	11064	4	0	10455	5044	3	0	20889	11522	2	0	3835	5848	1	0	2316	5998	3	0	4098	5654	4	0	2755	4684	2	0	5688	0	50.036	4	3	4	4	4	19	-9	-1		1		2	1564
90	2017-07-04 17:36:03	6	1	1	4	2	13497	4	0	3538	6892	3	0	1429	2173	2	0	2316	5558	1	0	2325	6350	3	0	2772	3405	4	0	3141	10442	2	0	5565	0	21.086	5	5	5	3	3	21	1	642	642	0	0	2	990
94	2017-07-04 17:52:11	3	-1	-1	3	1	7230	4	0	2545	2487	3	0	1018	11278	2	0	2681	9043	1	0	2483	10668	3	0	1986	6395	4	0	5838	12349	2	0	10741	0	27.292	4	5	5	4	5	23	2	1689	1689	0	1	2	952
111	2017-07-04 18:54:30	5	1	1	4	1	4738	4	0	1655	6894	3	0	1039	3402	2	0	1595	1975	1	0	2361	1482	3	0	3911	3238	4	0	2291	1150	1	1	3020	1	15.872	3	3	3	3	3	15	2	1319	1319	0	1	2	477
128	2017-07-04 22:13:50	6	-1	-1	3	1	3809	4	0	2571	6104	3	0	1662	5323	2	0	4902	2844	1	0	1438	3549	3	0	1325	4859	4	0	4403	6887	2	0	4993	0	21.294	5	5	5	3	2	20	-9	-1		1		1	158
156	2017-07-04 23:53:21	5	1	1	4	1	14389	4	0	2181	5725	3	0	1621	12117	2	0	2301	9134	1	0	2829	11356	3	0	2309	10877	4	0	3046	24877	2	0	8885	0	23.172	5	5	5	4	4	23	1	726	726	0	0	2	800
157	2017-07-04 23:55:47	3	1	1	3	1	11085	4	0	3485	6633	3	0	8966	6481	2	0	8752	6595	1	0	6025	13627	3	0	5120	14721	4	0	3907	22364	2	0	7647	0	43.902	5	5	5	3	4	22	1	1773	1773	0	0	2	1217
180	2017-07-05 09:33:59	6	3	3	2	2	8214	4	0	9929	1825	3	0	2122	3772	2	0	2593	3154	1	0	2595	5057	3	0	2809	4272	4	0	3664	4452	2	0	3634	0	27.346	3	3	2	3	3	14	-9	-1		1		1	663
191	2017-07-05 14:59:54	3	-1	-1	4	1	18304	4	0	2190	4450	3	0	1622	3441	2	0	3594	4421	1	0	1926	3697	3	0	1914	4874	4	0	2429	8162	1	1	15265	1	28.94	4	4	4	4	4	20	1	929	929	0	0	1	920
196	2017-07-05 18:39:24	5	-1	-1	3	1	19534	4	0	3626	2546	3	0	2561	6234	2	0	2812	4079	1	0	2434	5863	3	0	2274	3183	4	0	3438	3011	2	0	2648	0	19.793	3	4	4	4	4	19	1	750	750	0	0	2	912
198	2017-07-05 21:05:44	5	1	3	2	2	6391	4	0	4664	4183	3	0	8963	4349	1	1	7732	5282	3	1	4081	4100	3	0	3921	5009	3	1	3290	5458	2	0	7050	3	39.701	5	5	5	3	4	22	-9	-1		1		-9	-1
200	2017-07-05 21:46:52	3	1	2	2	1	11818	4	0	3128	2904	3	0	1155	4213	2	0	2157	7145	1	0	1834	5755	3	0	4588	4495	4	0	4225	6225	1	1	3956	1	21.043	4	3	5	3	4	19	-9	-1		1		-9	-1
201	2017-07-05 21:55:31	6	1	2	3	1	24324	4	0	2907	3083	3	0	1456	2251	2	0	1561	3160	1	0	1102	2189	3	0	1855	3590	4	0	3669	3663	2	0	7189	0	19.739	5	5	4	5	5	24	1	1191	1191	0	0	2	1160
204	2017-07-05 23:21:19	3	1	2	3	1	27095	4	0	5106	33384	3	0	3185	39573	2	0	7352	11542	1	0	4847	10097	3	0	3677	7915	4	0	5044	9428	2	0	6353	0	35.564	5	5	4	5	4	23	1	719	719	0	0	2	877
206	2017-07-06 08:24:14	4	2	2	3	1	5537	4	0	2649	3208	3	0	1229	3507	2	0	2456	5000	1	0	2361	5614	3	0	3820	5598	4	0	2405	8187	2	0	3079	0	17.999	4	3	5	4	3	19	-9	-1		1		2	1611
211		3	-1	-1	3	1	6816	4	0	2557	1690	3	0	1413	1633	2	0	1859	3445	1	0	1819	2038	3	0	1940	5150	4	0	2980	3402	2	0	7849	0	20.417	4	3	4	4	4	19	1	796	796	0	0	2	1020
219		6	3	3	2	2	6745	4	0	2788	5240	3	0	2168	5996	2	0	3050	5020	1	0	2519	3276	3	0	2835	5631	4	0	5272	4660	2	0	6225	0	24.857	3	3	3	3	4	16	2	1737	1737	0	1	2	2410
225		5	-1	-1	3	2	9126	4	0	3288	3801	3	0	2557	5696	2	0	2754	6104	1	0	2654	7653	3	0	3889	6806	4	0	3114	7093	2	0	4988	0	23.244	3	4	3	3	4	17	2	1432	1432	0	1	2	1705
238		3	-1	-1	1	1	4054	4	0	3001	3663	3	0	2509	4364	2	0	2397	5357	1	0	2133	2820	3	0	2901	1693	4	0	4164	5381	1	1	10708	1	27.813	4	2	5	4	4	19	-9	-1		1		-9	-1
239		5	1	2	4	2	6165	4	0	2874	1918	3	0	1569	2478	2	0	2403	2938	1	0	2554	2177	3	0	4465	2567	4	0	2956	1769	2	0	4681	0	21.502	4	3	4	2	4	17	2	2301	2301	0	1	2	1755
241		6	-1	-1	3	2	6880	4	0	3370	5629	3	0	2863	7125	2	0	3909	10094	1	0	4994	8697	3	0	2625	7376	4	0	3198	10390	2	0	4359	0	25.318	5	4	5	4	4	22	1	2190	2190	0	0	2	2383
244		5	2	2	2	1	21250	4	0	3825	5015	3	0	1315	3129	2	0	1820	9604	1	0	2276	1931	3	0	3120	3776	4	0	2477	19723	2	0	4823	0	19.656	4	4	4	2	3	17	-9	-1		1		-9	-1
246		3	-1	-1	1	2	5609	4	0	3166	4196	3	0	1650	2788	2	0	2487	1927	1	0	1779	3268	3	0	5236	2777	4	0	2122	3092	4	1	9174	1	25.614	4	3	4	2	4	17	-9	-1		1		2	1007
248		5	-1	-1	2	1	16734	4	0	2537	4885	3	0	1647	4615	2	0	2449	4848	1	0	2030	3359	3	0	3847	4747	4	0	2374	6276	2	0	8300	0	23.184	4	4	4	3	4	19	1	956	956	0	0	2	926
251		5	2	2	3	1	10953	4	0	3435	3491	3	0	2330	5842	2	0	1958	3809	1	0	3266	6821	3	0	2819	5237	4	0	5205	9655	2	0	8636	0	27.649	5	5	5	4	4	23	1	2259	2259	0	0	2	1414
[truncated: 344 more columns]

## Sheet: CSV_ALL
Diagram_SUMFamiliarity	Diagram_SUMHandling	Diagram_SUMDontKnow	Diagram_AVGError	SGLScore	Demog_HighestDegree	Demog_WorkingNumbers	Demog_WorkingCharts	Demog_StatisticalEducation	VWM_SUMError	VWM_SUMRT	PS_AVGRT	PS_SUMMistrials	PS_AVGError
54	54	1	0.4	25	6	2	2	4	1	19.649	1.09671	5	0.142857
23	25	1	0.733333	15	3	1	3	3	2	37.225
48	48	2	0.533333	17	3	1	2	3	0	24.355	1.25877	4	0.181818
30	52	1	0.4375	21	3			3	0	21.924	0.953577	0	0.384615
28	41	2	0.866667	18	3	1	2	2	0	20.284	0.588667	2	0.416667
37	43	4	0.583333	16	6	1	2	3	1	31.152	1.26625	10	0.125
38	35	5	0.75	21	5			3	0	29.979	0.816231	0	0.384615
62	65	0	0.625	24	5	1	2	3	0	38.999	0.751048	5	0.52381
27	29	2	0.4	20	6	2	3	2	0	13.93	0.892462	0	0.0384615
59	48	1	0.375	24	5			2	2	18.206	1.24292	0	0.384615
43	37	2	0.714286	19	5			3	2	67.507	0.55092	1	0.28
37	35	6	1	19	3	1	1	2	0	25.457
46	45	0	0.6875	15	5	1	3	3	0	14.477	0.847269	0	0.192308
42	50	5	0.416667	18	3			3	3	63.443
51	54	1	0.133333	23	5		1	3	0	33.765	1.09415	0	0.0769231
45	47	1	0.266667	19	5	1	3	3	0	19.66	1.28731	0	0.653846
39	31	5	0.666667	22	6	1	1	3	0	32.474	0.924654	0	0.0769231
47	44	5	0.666667	17	6	1	1	3	3	66.708	1.12338	2	0.125
58	66	1	0.6	23	5	2	1	4	0	15.344	0.973462	0	0.0384615
48	54	0	1	18	6	1	2	4	0	51.792	1.07258	0	0.153846
25	30	2	0.933333	19	5	2	2	3	0	50.036	1.1262	1	0.04
57	57	1	0.6	21	6	1	1	4	0	21.086	0.9145	0	0.0384615
35	39	0	0.375	23	3			3	0	27.292	1.2698	1	0.04
34	34	3	0.357143	15	5	1	1	4	1	15.872	0.59276	1	0.36
50	44	4	0.923077	20	6			3	0	21.294	0.60492	1	0.32
57	62	3	0.692308	23	5	1	1	4	0	23.172	0.855192	0	0.346154
38	36	4	0.615385	22	3	1	1	3	0	43.902	1.11517	2	0.375
29	34	3	0.538462	14	6	3	3	2	0	27.346	1.11861	3	0.130435
33	36	5	0.416667	20	3			4	1	28.94	0.973038	0	0.153846
27	43	1	0.666667	19	5			3	0	19.793	0.998923	0	0.192308
49	50	6	0.727273	22	5	1	3	2	3	39.701	0.74	7	0.368421
34	46	3	0.5	19	3	1	2	2	1	21.043	1.13005	7	0.157895
53	64	0	0.5	24	6	1	2	3	0	19.739	0.984846	0	0.461538
38	47	3	1.15385	23	3	1	2	3	0	35.564	1.02469	0	0.307692
48	48	4	0.5	19	4	2	2	3	0	17.999	0.98356	1	0
30	42	0	79.1875	19	3			3	0	20.417	0.797731	0	0.0769231
32	30	2	90.9375	16	6	3	3	2	0	24.857	1.47347	9	0.176471
33	30	1	85.8125	17	5			3	0	23.244	1.34963	2	0.208333
42	39	3	54.6	19	3			1	1	27.813	1.0417	3	0.478261
65	54	0	47.75	17	5	1	2	4	0	21.502	0.52768	1	0.52
35	35	7	55.2667	22	6			3	0	25.318	1.43608	1	0.16
39	52	3	76.6	17	5	2	2	2	0	19.656	1.12986	12	0.285714
25	34	10	65.7333	17	3			1	1	25.614	1.6471	6	0.1
47	52	1	98.4667	19	5			2	0	23.184	0.893269	0	0.461538
45	45	0	101.25	23	5	2	2	3	0	27.649	1.12346	0	0.307692

## Sheet: CSV_Experts
Diagram_SUMFamiliarity	Diagram_SUMHandling	Diagram_SUMDontKnow	Diagram_AVGError	SGLScore	Demog_HighestDegree	Demog_WorkingNumbers	Demog_WorkingCharts	Demog_StatisticalEducation	VWM_SUMError	VWM_SUMRT	PS_AVGRT	PS_SUMMistrials	PS_AVGError
15	15	1	0.5	25	6	2	2	4	1	19.649	1.09671	5	0.142857
5	5	1	0.75	15	3	1	3	3	2	37.225
15	15	1	0.4	17	3	1	2	3	0	24.355	1.25877	4	0.181818
7	12	1	0.2	21	3			3	0	21.924	0.953577	0	0.384615
5	10	2	1.25	18	3	1	2	2	0	20.284	0.588667	2	0.416667
10	13	2	0.666667	16	6	1	2	3	1	31.152	1.26625	10	0.125
10	9	2	0.75	21	5			3	0	29.979	0.816231	0	0.384615
18	19	0	0.2	24	5	1	2	3	0	38.999	0.751048	5	0.52381
7	6	1	0.2	20	6	2	3	2	0	13.93	0.892462	0	0.0384615
13	8	1	0.2	24	5			2	2	18.206	1.24292	0	0.384615
13	11	1	0.5	19	5			3	2	67.507	0.55092	1	0.28
5	5	5	1	19	3	1	1	2	0	25.457
11	11	0	0.8	15	5	1	3	3	0	14.477	0.847269	0	0.192308
7	8	4	0.5	18	3			3	3	63.443
15	17	0	0.4	23	5		1	3	0	33.765	1.09415	0	0.0769231
10	10	1	0.5	19	5	1	3	3	0	19.66	1.28731	0	0.653846
9	8	3	0.333333	22	6	1	1	3	0	32.474	0.924654	0	0.0769231
12	11	2	0.5	17	6	1	1	3	3	66.708	1.12338	2	0.125
16	18	0	0.4	23	5	2	1	4	0	15.344	0.973462	0	0.0384615
16	16	0	0.6	18	6	1	2	4	0	51.792	1.07258	0	0.153846
6	6	2	1	19	5	2	2	3	0	50.036	1.1262	1	0.04
12	12	0	0.8	21	6	1	1	4	0	21.086	0.9145	0	0.0384615
8	8	0	0.4	23	3			3	0	27.292	1.2698	1	0.04
10	9	2	0.25	15	5	1	1	4	1	15.872	0.59276	1	0.36
10	9	3	1	20	6			3	0	21.294	0.60492	1	0.32
16	17	1	0.75	23	5	1	1	4	0	23.172	0.855192	0	0.346154
10	10	3	0.666667	22	3	1	1	3	0	43.902	1.11517	2	0.375
7	8	1	0.5	14	6	3	3	2	0	27.346	1.11861	3	0.130435
8	8	3	0.666667	20	3			4	1	28.94	0.973038	0	0.153846
7	12	1	0.75	19	5			3	0	19.793	0.998923	0	0.192308
6	6	5	1	22	5	1	3	2	3	39.701	0.74	7	0.368421
7	10	2	0.75	19	3	1	2	2	1	21.043	1.13005	7	0.157895
13	16	0	0.4	24	6	1	2	3	0	19.739	0.984846	0	0.461538
7	8	2	0.666667	23	3	1	2	3	0	35.564	1.02469	0	0.307692
10	10	2	1.33333	19	4	2	2	3	0	17.999	0.98356	1	0
8	12	0	0.6	19	3			3	0	20.417	0.797731	0	0.0769231
8	8	2	0.333333	16	6	3	3	2	0	24.857	1.47347	9	0.176471
9	7	1	0.5	17	5			3	0	23.244	1.34963	2	0.208333
8	9	2	0.25	19	3			1	1	27.813	1.0417	3	0.478261
20	18	0	1	17	5	1	2	4	0	21.502	0.52768	1	0.52
5	5	5	1	22	6			3	0	25.318	1.43608	1	0.16
13	14	2	0.5	17	5	2	2	2	0	19.656	1.12986	12	0.285714
5	7	5	1	17	3			1	1	25.614	1.6471	6	0.1
13	15	0	0.2	19	5			2	0	23.184	0.893269	0	0.461538
10	10	0	0.4	23	5	2	2	3	0	27.649	1.12346	0	0.307692
